# Supplementary material for: Concerted proton electron transfer or hydrogen atom transfer? an unequivocal strategy to discriminate these mechanisms in model systems
Source: Royal Society of Chemistry journal article supplement (doi:10.1039/d5cp00690b), 2025-01-01
Supplement: d5cp00690b1.pdf [file d5cp00690b1.pdf]

## – Supporting Information –

# Concerted Proton Electron Transfer or Hydrogen Atom Transfer? An Unequivocal Strategy to Discriminate these Mechanisms in Model Systems

*Davide Zeppilli<sup>a</sup> and Laura Orian<sup>a,b,\*</sup>*

<sup>a</sup> Dipartimento di Scienze Chimiche, Università degli Studi di Padova, Via Marzolo 1, 35131 Padova, Italy

<sup>b</sup> Istituto Nazionale di Fisica Nucleare, Laboratori Nazionali di Legnaro (INFN-LNL), 35020 Legnaro (PD) Italy.

\* Correspondence: laura.orian@unipd.it

### LIST of TABLES and FIGURES:

**Table S1.** Electronic reaction and activation energies (kcal mol<sup>-1</sup>) computed for each system at different levels of theory.  $\Delta E_1^\ddagger$  and  $\Delta E_2^\ddagger$  refer to the relaxed and the partially constrained transition states, while  $\Delta\Delta E^\ddagger$  represents the energy difference between the two species. All geometries have been optimized at M06-2X/6-31G(d) level of theory.....S3

**Table S2.** Electronic activation energies (kcal mol<sup>-1</sup>) computed for methoxyl/methanol self-exchange reaction with different basis set and M06-2X functional.  $\Delta E_1^\ddagger$  and  $\Delta E_2^\ddagger$  refer to the relaxed and the partially constrained transition states, while  $\Delta\Delta E^\ddagger$  represents the energy difference between the two species.....S3

**Table S3.** Electronic activation energies (kcal mol<sup>-1</sup>) computed for methoxyl/methanol self-exchange reaction with functionals.  $\Delta E_1^\ddagger$  and  $\Delta E_2^\ddagger$  refer to the relaxed and the partially constrained transition states, while  $\Delta\Delta E^\ddagger$  represents the energy difference between the two species. All geometries have been optimized with 6-31G(d) basis set, while energies are obtained by single point calculation with 6-311+G(d,p) basis set.....S4

**Figure S1.** SOMO of the transition state for the methoxyl/methanol self-exchange reaction. (A) Relaxed structure and (B) partially constrained structure with a C-O-O-C dihedral angle of 175°. Level of theory: M06-2X/6-311+G(d,p)//M06-2X/6-31G(d).....S4

**Figure S2.** Changes in the  $\alpha_{OH}$  spin IBOs involved in the hydrogen abstraction from phenol by <sup>•</sup>OOH along the reaction path:  $\alpha_{OH}$  spin IBO of the OH  $\sigma$  bond (green). Level of theory: M06-2X/def2TZVP//M06-2X/6-31G(d).....S5

**Figure S3.** Changes in the main spin IBOs involved in the phenoxyl/phenol self-exchange reaction along the energetically disfavored reaction path via the partially constrained transition state:  $\beta_\pi$  spin IBO (blue) transferred from the  $\pi$  system of the ring, and  $\beta_{OH}$  spin IBO of the OH  $\sigma$  bond (green). Level of theory: M06-2X/def2TZVP//M06-2X/6-31G(d).....S5

**Figure S4.** Changes in the main  $\beta$  spin IBO involved in the benzyl/toluene self-exchange reaction along (A) the relaxed and (B) the disfavored reaction path. Level of theory: M06-2X/def2TZVP//M06-2X/6-31G(d).....S5

**Figure S5.** Changes in the main  $\beta$  spin IBO involved in the methoxyl/methanol self-exchange reaction along (A) the relaxed and (B) the disfavored reaction path. Level of theory: M06-2X/def2TZVP//M06-2X/6-31G(d).....S6

**Figure S6.** Activation strain analysis of the hydrogen abstraction from phenol by  $\cdot\text{OOH}$ : energy profiles (solid lines),  $\Delta E_{\text{strain}}$  (dashed lines),  $\Delta E_{\text{int}}$  (dash-dotted lines) along the relaxed (blue lines) and the disfavored reaction path (green lines). The filled circles represent the position of the transition states. The reaction coordinate is defined as the degree of O-H bond breaking with respect to the same distance in the reactant complex. Level of theory: ZORA-M06-2X/TZ2P//M06-2X/6-31G(d).....S6

**Figure S7.** Activation strain analysis of the phenoxyl/phenol self-exchange reaction: energy profiles (solid lines),  $\Delta E_{\text{strain}}$  (dashed lines),  $\Delta E_{\text{int}}$  (dash-dotted lines) along the relaxed (blue lines) and the disfavored reaction path (green lines). The filled circles represent the position of the transition states. The reaction coordinate is defined as the degree of O-H bond breaking with respect to the same distance in the reactant complex. Level of theory: ZORA-M06-2X/TZ2P//M06-2X/6-31G(d).....S7

**Figure S8.** Energy decomposition analysis of the phenoxyl/phenol self-exchange reaction: (A)  $\Delta E_{\text{Pauli}}$ , (B)  $\Delta V_{\text{elstat}}$  along the relaxed (blue lines) and the disfavored reaction path (green lines). The filled circles represent the position of the transition states. The reaction coordinate is defined as the degree of O-H bond formation with respect to the same distance in the reactant complex. Level of theory: ZORA-M06-2X/TZ2P//M06-2X/6-31G(d).....S7

**Figure S9.** Deformation densities of the dominating contributions to  $\Delta E_{\text{OI}}$  of (A) the relaxed and (B) the partially constrained reaction path at r.c.=0.39 of the benzyl/toluene self-exchange reaction, according to EDA-NOCV scheme. Blue/red phases correspond to accumulation/depletion of  $\beta$  electron densities, respectively; isosurface value 0.003. Level of theory: ZORA-M06-2X/TZ2P//M06-2X/6-31G(d).....S8

**Figure S10.** (A) Activation strain analysis of the methoxyl/methanol self-exchange reaction: energy profiles (solid lines),  $\Delta E_{\text{strain}}$  (dashed lines),  $\Delta E_{\text{int}}$  (dash-dotted lines) along the relaxed (blue lines) and the disfavored reaction path (green lines). Energy decomposition analysis: (B)  $\Delta E_{\text{Pauli}}$ , (C)  $\Delta V_{\text{elstat}}$ , (D)  $\Delta E_{\text{OI}}$ . The filled circles represent the position of the transition states. The reaction coordinate is defined as the degree of O-H bond formation with respect to the same distance in the reactant complex. Level of theory: ZORA-M06-2X/TZ2P//M06-2X/6-31G(d).....S8

**Figure S11.** Changes in the main  $\beta$  spin IBO involved in the phenoxyl/phenol self-exchange reaction along a reaction path with an increased O-O distance in the transition state of (A) 1 Å and (B) 2 Å. Level of theory: M06-2X/def2TZVP//M06-2X/6-31G(d).....S9

**Table S4.** Coordinates (Å) and energies (E, Hartree) of stationary points and number of imaginary frequencies (Nimag,  $\text{cm}^{-1}$ ) of transition states. Level of theory: M06/6-31G(d).....S9

**Table S1.** Electronic reaction and activation energies (kcal mol<sup>-1</sup>) computed for each system at different levels of theory.  $\Delta E_1^\ddagger$  and  $\Delta E_2^\ddagger$  refer to the relaxed and the partially constrained transition states, while  $\Delta\Delta E^\ddagger$  represents the energy difference between the two species. All geometries have been optimized at M06-2X/6-31G(d) level of theory.

| reaction             |                           | M06-2X/6-311+G(d,p) | ZORA-M06-2X/TZ2P | DLPNO-CCSD(T)/cc-pVTZ-DK | MP2/aug-cc-pVTZ |
|----------------------|---------------------------|---------------------|------------------|--------------------------|-----------------|
| phenol +<br>•OOH     | $\Delta E$                | 3.5                 | 4.5              | 2.4                      | 24.5            |
|                      | $\Delta E_1^\ddagger$     | 9.6                 | 10.8             | 15.4                     | 32.3            |
|                      | $\Delta E_2^\ddagger$     | 15.5                | 16.5             | 23.3                     | 27.2            |
|                      | $\Delta\Delta E^\ddagger$ | 5.9                 | 5.8              | 8.0                      | -5.1            |
| phenoxy/<br>phenol   | $\Delta E_1^\ddagger$     | 0.8                 | 1.6              | -                        | 1.2             |
|                      | $\Delta E_2^\ddagger$     | 5.1                 | 5.9              | -                        | 7.3             |
|                      | $\Delta\Delta E^\ddagger$ | 4.7                 | 4.3              | -                        | 6.2             |
| benzyl/<br>toluene   | $\Delta E_1^\ddagger$     | 13.4                | 15.0             | -                        | 34.5            |
|                      | $\Delta E_2^\ddagger$     | 17.0                | 17.6             | -                        | 38.4            |
|                      | $\Delta\Delta E^\ddagger$ | 3.6                 | 2.6              | -                        | 3.9             |
| methoxy/<br>methanol | $\Delta E_1^\ddagger$     | 7.2                 | 7.7              | 9.6                      | 10.1            |
|                      | $\Delta E_2^\ddagger$     | 8.8                 | 9.3              | 11.5                     | 12.3            |
|                      | $\Delta\Delta E^\ddagger$ | 1.6                 | 1.6              | 1.9                      | 2.1             |

DLPNO-CCSD(T) calculations were not computed for the biggest systems due to the high computational cost.

**Table S2.** Electronic activation energies (kcal mol<sup>-1</sup>) computed for methoxy/methanol self-exchange reaction with different basis set and M06-2X functional.  $\Delta E_1^\ddagger$  and  $\Delta E_2^\ddagger$  refer to the relaxed and the partially constrained transition states, while  $\Delta\Delta E^\ddagger$  represents the energy difference between the two species.

|                           | cc-pVTZ | def2TZVP | 6-311+G(d,p) | 6-311+G(d,p)//<br>6-31G(d) |
|---------------------------|---------|----------|--------------|----------------------------|
| $\Delta E_1^\ddagger$     | 6.23    | 7.01     | 7.06         | 7.19                       |
| $\Delta E_2^\ddagger$     | 8.13    | 8.73     | 8.68         | 8.82                       |
| $\Delta\Delta E^\ddagger$ | 1.90    | 1.72     | 1.62         | 1.64                       |

No significant geometrical variation is observed using the cc-pVTZ, def2TZVP and 6-311+G(d,p) basis sets, neither in the minima, nor in the transition states. Furthermore, the energies remain consistent with the ones reported in the main text.

**Table S3.** Electronic activation energies (kcal mol<sup>-1</sup>) computed for methoxyl/methanol self-exchange reaction with functionals.  $\Delta E_1^\ddagger$  and  $\Delta E_2^\ddagger$  refer to the relaxed and the partially constrained transition states, while  $\Delta\Delta E^\ddagger$  represents the energy difference between the two species. All geometries have been optimized with 6-31G(d) basis set, while energies are obtained by single point calculation with 6-311+G(d,p) basis set.

|                           | BLYP-D3BJ | BLYP  | M06L | PBE1PBE-D3BJ | PBE1PBE | M06  | M05-2X | M06-2X |
|---------------------------|-----------|-------|------|--------------|---------|------|--------|--------|
| $\Delta E_1^\ddagger$     | -4.48     | -2.74 | 1.22 | 3.57         | 4.51    | 5.25 | 8.27   | 7.19   |
| $\Delta E_2^\ddagger$     | -4.26     | -2.54 | 1.76 | 4.51         | 5.39    | 6.52 | 9.97   | 8.82   |
| $\Delta\Delta E^\ddagger$ | 0.22      | 0.20  | 0.53 | 0.95         | 0.87    | 1.26 | 1.69   | 1.64   |

GGA functional (BLYP and BLYP-D3BJ) does not reproduce the energy barriers which become negative with respect to free reactants. During TS optimization, the C-O-O-C dihedral angle increases, which becomes similar to the one of the partially constrained TS; thus, similar energies are computed. Meta-GGA (M06L) and hybrid functionals (PBE1PBE and PBE1PBE-D3BJ) improve the description of the energy barriers (positive numbers) as well as the energy difference between the two TSs; still, a slight increase of the C-O-O-C dihedral angle is computed. The best agreement with M06-2X functional is found with meta-hybrid functionals of the same family (M06 and M05-2X), which are also suggested by the QM-ORSA protocol.

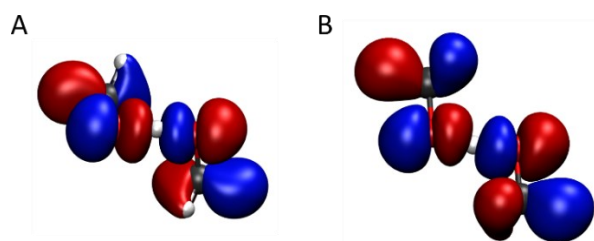

**Figure S1.** SOMO of the transition state for the methoxyl/methanol self-exchange reaction. (A) Relaxed structure and (B) partially constrained structure with a C-O-O-C dihedral angle of 175°. Level of theory: M06-2X/6-311+G(d,p)//M06-2X/6-31G(d).

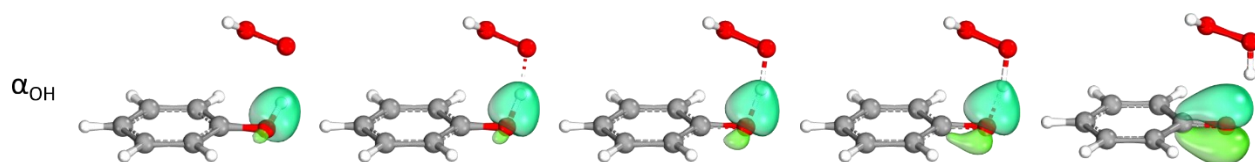

**Figure S2.** Changes in the  $\alpha_{\text{OH}}$  spin IBOs involved in the hydrogen abstraction from phenol by  $\cdot\text{OOH}$  along the reaction path:  $\alpha_{\text{OH}}$  spin IBO of the OH  $\sigma$  bond (green). Level of theory: M06-2X/def2TZVP//M06-2X/6-31G(d).

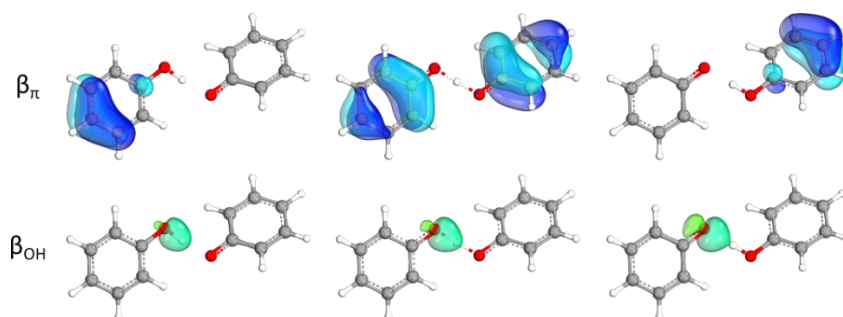

**Figure S3.** Changes in the main spin IBOs involved in the phenoxyl/phenol self-exchange reaction along the energetically disfavored reaction path via the partially constrained transition state:  $\beta_{\pi}$  spin IBO (blue) transferred from the  $\pi$  system of the ring, and  $\beta_{\text{OH}}$  spin IBO of the OH  $\sigma$  bond (green). Level of theory: M06-2X/def2TZVP//M06-2X/6-31G(d).

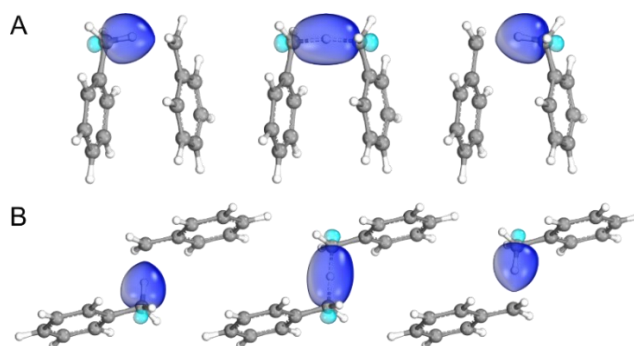

**Figure S4.** Changes in the main  $\beta$  spin IBO involved in the benzyl/toluene self-exchange reaction along (A) the relaxed and (B) the disfavored reaction path. Level of theory: M06-2X/def2TZVP//M06-2X/6-31G(d).

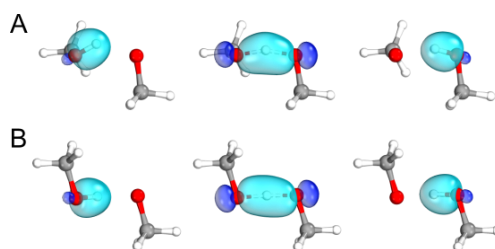

**Figure S5.** Changes in the main  $\beta$  spin IBO involved in the methoxy/methanol self-exchange reaction along (A) the relaxed and (B) the disfavored reaction path. Level of theory: M06-2X/def2TZVP//M06-2X/6-31G(d).

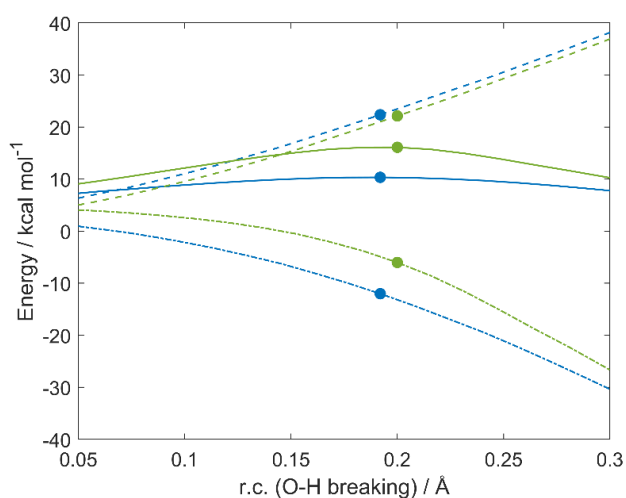

**Figure S6.** Activation strain analysis of the hydrogen abstraction from phenol by  $\bullet\text{OOH}$ : energy profiles (solid lines),  $\Delta E_{\text{strain}}$  (dashed lines),  $\Delta E_{\text{int}}$  (dash-dotted lines) along the relaxed (blue lines) and the disfavored reaction path (green lines). The filled circles represent the position of the transition states. The reaction coordinate is defined as the degree of O-H bond breaking with respect to the same distance in the reactant complex. Level of theory: ZORA-M06-2X/TZ2P//M06-2X/6-31G(d).

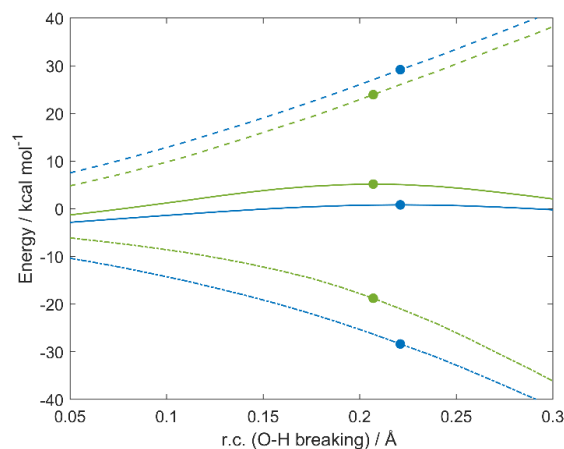

**Figure S7.** Activation strain analysis of the phenoxyl/phenol self-exchange reaction: energy profiles (solid lines),  $\Delta E_{strain}$  (dashed lines),  $\Delta E_{int}$  (dash-dotted lines) along the relaxed (blue lines) and the disfavored reaction path (green lines). The filled circles represent the position of the transition states. The reaction coordinate is defined as the degree of O-H bond breaking with respect to the same distance in the reactant complex. Level of theory: ZORA-M06-2X/TZ2P//M06-2X/6-31G(d).

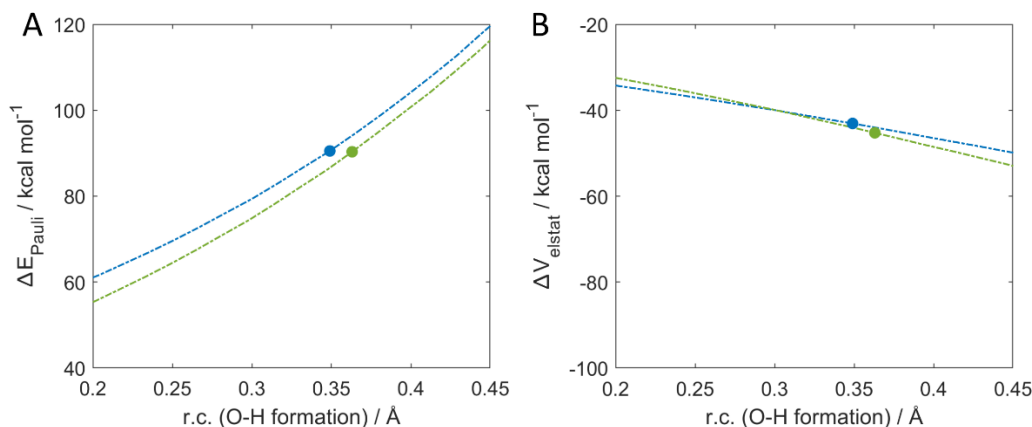

**Figure S8.** Energy decomposition analysis of the phenoxyl/phenol self-exchange reaction: (A)  $\Delta E_{Pauli}$ , (B)  $\Delta V_{elstat}$  along the relaxed (blue lines) and the disfavored reaction path (green lines). The filled circles represent the position of the transition states. The reaction coordinate is defined as the degree of O-H bond formation with respect to the same distance in the reactant complex. Level of theory: ZORA-M06-2X/TZ2P//M06-2X/6-31G(d).

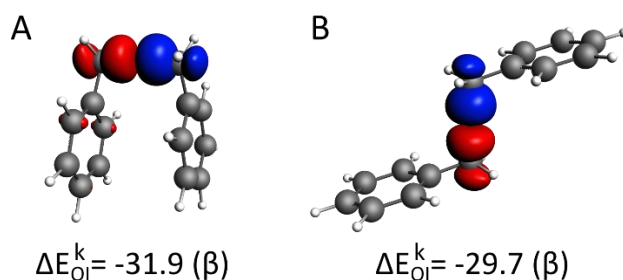

**Figure S9.** Deformation densities of the dominating contributions to  $\Delta E_{OI}$  of (A) the relaxed and (B) the partially constrained reaction path at r.c.=0.39 of the benzyl/toluene self-exchange reaction, according to the EDA-NOCV scheme. Blue/red phases correspond to accumulation/depletion of  $\beta$  electron densities, respectively; isosurface value 0.003. Level of theory: ZORA-M06-2X/TZ2P//M06-2X/6-31G(d).

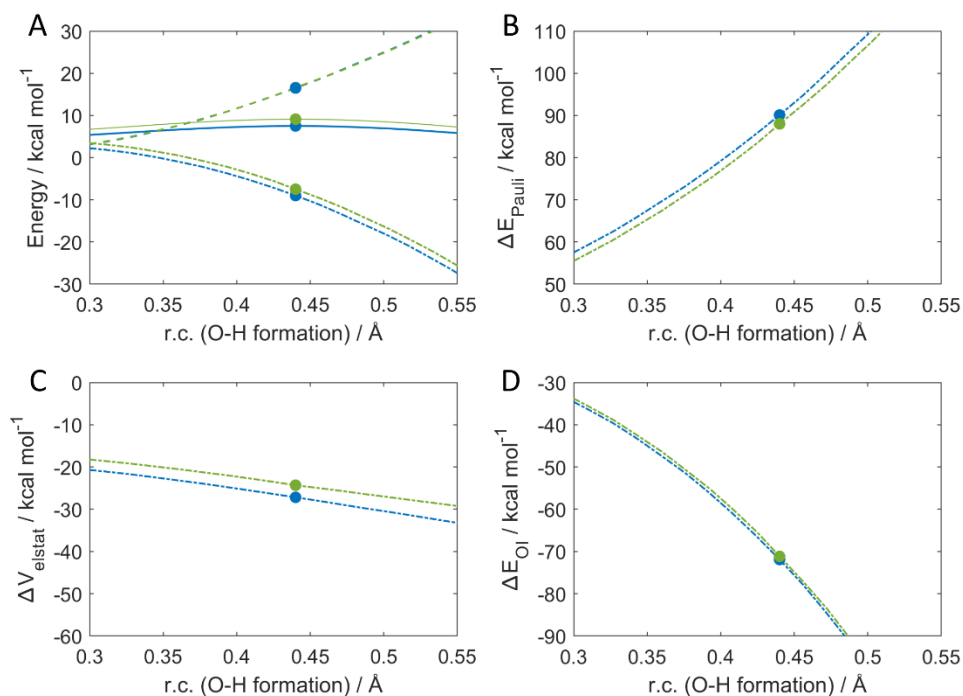

**Figure S10.** (A) Activation strain analysis of the methoxyl/methanol self-exchange reaction: energy profiles (solid lines),  $\Delta E_{strain}$  (dashed lines),  $\Delta E_{int}$  (dash-dotted lines) along the relaxed (blue lines) and the disfavored reaction path (green lines). Energy decomposition analysis: (B)  $\Delta E_{Pauli}$ , (C)  $\Delta V_{elstat}$ , (D)  $\Delta E_{OI}$ . The filled circles represent the position of the transition states. The reaction coordinate is defined as the degree of O-H bond formation with respect to the same distance in the reactant complex. Level of theory: ZORA-M06-2X/TZ2P//M06-2X/6-31G(d).



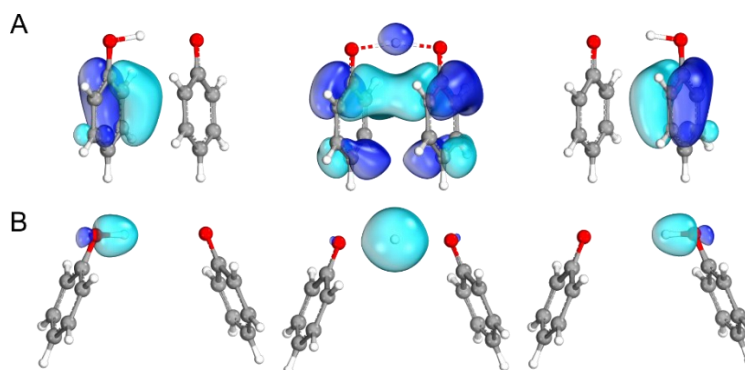

**Figure S11.** Changes in the main  $\beta$  spin IBO involved in the phenoxyl/phenol self-exchange reaction along a reaction path with an increased O-O distance in the transition state of (A) 1 Å and (B) 2 Å. Level of theory: M06-2X/def2TZVP//M06-2X/6-31G(d).

**Table S4.** Coordinates (Å) and energies (E, Hartree) of stationary points and number of imaginary frequencies (Nimag,  $\text{cm}^{-1}$ ) of transition states. Level of theory: M06/6-31G(d).

|                                              |           |           |           |   |           |           |          |
|----------------------------------------------|-----------|-----------|-----------|---|-----------|-----------|----------|
| <b>Phenol + <math>\cdot\text{OOH}</math></b> |           |           |           | O | -0.797984 | -0.695042 | 1.222970 |
|                                              |           |           |           | H | -1.523307 | -0.915719 | 0.622098 |
| <b><math>\cdot\text{OOH}</math></b>          |           |           |           |   |           |           |          |
| E= -150.832724                               |           |           |           |   |           |           |          |
| O                                            | 0.055503  | 0.709875  | 0.000000  |   |           |           |          |
| O                                            | 0.055503  | -0.601901 | 0.000000  |   |           |           |          |
| H                                            | -0.888054 | -0.863793 | 0.000000  |   |           |           |          |
| <b>HOOH</b>                                  |           |           |           |   |           |           |          |
| E= -151.4681908                              |           |           |           |   |           |           |          |
| O                                            | 0.000000  | 0.713705  | -0.055572 |   |           |           |          |
| O                                            | 0.000000  | -0.713705 | -0.055572 |   |           |           |          |
| H                                            | -0.812252 | -0.891397 | 0.444578  |   |           |           |          |
| H                                            | 0.812252  | 0.891397  | 0.444578  |   |           |           |          |
| <b>Phenol</b>                                |           |           |           |   |           |           |          |
| E= -307.329665839                            |           |           |           |   |           |           |          |
| C                                            | 1.459724  | -0.002560 | -1.590836 |   |           |           |          |
| C                                            | 0.302766  | -0.357463 | -0.902738 |   |           |           |          |
| C                                            | 2.613494  | 0.351389  | -0.898429 |   |           |           |          |
| H                                            | -0.598328 | -0.633926 | -1.445875 |   |           |           |          |
| H                                            | 3.513008  | 0.627411  | -1.438130 |   |           |           |          |
| C                                            | 0.300782  | -0.358135 | 0.491987  |   |           |           |          |
| C                                            | 2.600694  | 0.347461  | 0.495887  |   |           |           |          |
| H                                            | 3.494895  | 0.621866  | 1.047414  |   |           |           |          |
| C                                            | 1.452993  | -0.004672 | 1.194890  |   |           |           |          |
| H                                            | 1.424902  | -0.013201 | 2.279137  |   |           |           |          |
| H                                            | 1.453956  | -0.004310 | -2.676608 |   |           |           |          |
|                                              |           |           |           |   |           |           |          |
|                                              |           |           |           |   |           |           |          |
|                                              |           |           |           |   |           |           |          |
|                                              |           |           |           |   |           |           |          |
|                                              |           |           |           |   |           |           |          |
|                                              |           |           |           |   |           |           |          |
|                                              |           |           |           |   |           |           |          |
|                                              |           |           |           |   |           |           |          |
|                                              |           |           |           |   |           |           |          |
|                                              |           |           |           |   |           |           |          |
|                                              |           |           |           |   |           |           |          |
|                                              |           |           |           |   |           |           |          |
|                                              |           |           |           |   |           |           |          |
|                                              |           |           |           |   |           |           |          |
|                                              |           |           |           |   |           |           |          |
|                                              |           |           |           |   |           |           |          |
|                                              |           |           |           |   |           |           |          |
|                                              |           |           |           |   |           |           |          |
|                                              |           |           |           |   |           |           |          |
|                                              |           |           |           |   |           |           |          |
|                                              |           |           |           |   |           |           |          |
|                                              |           |           |           |   |           |           |          |
|                                              |           |           |           |   |           |           |          |
|                                              |           |           |           |   |           |           |          |
|                                              |           |           |           |   |           |           |          |
|                                              |           |           |           |   |           |           |          |
|                                              |           |           |           |   |           |           |          |
|                                              |           |           |           |   |           |           |          |
|                                              |           |           |           |   |           |           |          |
|                                              |           |           |           |   |           |           |          |
|                                              |           |           |           |   |           |           |          |
|                                              |           |           |           |   |           |           |          |
|                                              |           |           |           |   |           |           |          |
|                                              |           |           |           |   |           |           |          |
|                                              |           |           |           |   |           |           |          |
|                                              |           |           |           |   |           |           |          |
|                                              |           |           |           |   |           |           |          |
|                                              |           |           |           |   |           |           |          |
|                                              |           |           |           |   |           |           |          |
|                                              |           |           |           |   |           |           |          |
|                                              |           |           |           |   |           |           |          |
|                                              |           |           |           |   |           |           |          |
|                                              |           |           |           |   |           |           |          |
|                                              |           |           |           |   |           |           |          |
|                                              |           |           |           |   |           |           |          |
|                                              |           |           |           |   |           |           |          |
|                                              |           |           |           |   |           |           |          |
|                                              |           |           |           |   |           |           |          |
|                                              |           |           |           |   |           |           |          |
|                                              |           |           |           |   |           |           |          |
|                                              |           |           |           |   |           |           |          |
|                                              |           |           |           |   |           |           |          |
|                                              |           |           |           |   |           |           |          |
|                                              |           |           |           |   |           |           |          |
|                                              |           |           |           |   |           |           |          |
|                                              |           |           |           |   |           |           |          |
|                                              |           |           |           |   |           |           |          |
|                                              |           |           |           |   |           |           |          |
|                                              |           |           |           |   |           |           |          |
|                                              |           |           |           |   |           |           |          |
|                                              |           |           |           |   |           |           |          |
|                                              |           |           |           |   |           |           |          |
|                                              |           |           |           |   |           |           |          |
|                                              |           |           |           |   |           |           |          |
|                                              |           |           |           |   |           |           |          |
|                                              |           |           |           |   |           |           |          |
|                                              |           |           |           |   |           |           |          |
|                                              |           |           |           |   |           |           |          |
|                                              |           |           |           |   |           |           |          |
|                                              |           |           |           |   |           |           |          |
|                                              |           |           |           |   |           |           |          |
|                                              |           |           |           |   |           |           |          |
|                                              |           |           |           |   |           |           |          |
|                                              |           |           |           |   |           |           |          |
|                                              |           |           |           |   |           |           |          |
|                                              |           |           |           |   |           |           |          |
|                                              |           |           |           |   |           |           |          |
|                                              |           |           |           |   |           |           |          |
|                                              |           |           |           |   |           |           |          |
|                                              |           |           |           |   |           |           |          |
|                                              |           |           |           |   |           |           |          |
|                                              |           |           |           |   |           |           |          |
|                                              |           |           |           |   |           |           |          |
|                                              |           |           |           |   |           |           |          |
|                                              |           |           |           |   |           |           |          |
|                                              |           |           |           |   |           |           |          |
|                                              |           |           |           |   |           |           |          |
|                                              |           |           |           |   |           |           |          |
|                                              |           |           |           |   |           |           |          |
|                                              |           |           |           |   |           |           |          |
|                                              |           |           |           |   |           |           |          |
|                                              |           |           |           |   |           |           |          |
|                                              |           |           |           |   |           |           |          |
|                                              |           |           |           |   |           |           |          |
|                                              |           |           |           |   |           |           |          |
|                                              |           |           |           |   |           |           |          |
|                                              |           |           |           |   |           |           |          |
|                                              |           |           |           |   |           |           |          |
|                                              |           |           |           |   |           |           |          |
|                                              |           |           |           |   |           |           |          |
|                                              |           |           |           |   |           |           |          |
|                                              |           |           |           |   |           |           |          |
|                                              |           |           |           |   |           |           |          |
|                                              |           |           |           |   |           |           |          |
|                                              |           |           |           |   |           |           |          |
|                                              |           |           |           |   |           |           |          |
|                                              |           |           |           |   |           |           |          |
|                                              |           |           |           |   |           |           |          |
|                                              |           |           |           |   |           |           |          |
|                                              |           |           |           |   |           |           |          |
|                                              |           |           |           |   |           |           |          |
|                                              |           |           |           |   |           |           |          |
|                                              |           |           |           |   |           |           |          |
|                                              |           |           |           |   |           |           |          |
|                                              |           |           |           |   |           |           |          |
|                                              |           |           |           |   |           |           |          |
|                                              |           |           |           |   |           |           |          |
|                                              |           |           |           |   |           |           |          |
|                                              |           |           |           |   |           |           |          |
|                                              |           |           |           |   |           |           |          |
|                                              |           |           |           |   |           |           |          |
|                                              |           |           |           |   |           |           |          |
|                                              |           |           |           |   |           |           |          |
|                                              |           |           |           |   |           |           |          |
|                                              |           |           |           |   |           |           |          |
|                                              |           |           |           |   |           |           |          |
|                                              |           |           |           |   |           |           |          |
|                                              |           |           |           |   |           |           |          |
|                                              |           |           |           |   |           |           |          |
|                                              |           |           |           |   |           |           |          |
|                                              |           |           |           |   |           |           |          |
|                                              |           |           |           |   |           |           |          |
|                                              |           |           |           |   |           |           |          |
|                                              |           |           |           |   |           |           |          |
|                                              |           |           |           |   |           |           |          |
|                                              |           |           |           |   |           |           |          |
|                                              |           |           |           |   |           |           |          |
|                                              |           |           |           |   |           |           |          |
|                                              |           |           |           |   |           |           |          |
|                                              |           |           |           |   |           |           |          |
|                                              |           |           |           |   |           |           |          |
|                                              |           |           |           |   |           |           |          |
|                                              |           |           |           |   |           |           |          |
|                                              |           |           |           |   |           |           |          |
|                                              |           |           |           |   |           |           |          |
|                                              |           |           |           |   |           |           |          |
|                                              |           |           |           |   |           |           |          |
|                                              |           |           |           |   |           |           |          |
|                                              |           |           |           |   |           |           |          |
|                                              |           |           |           |   |           |           |          |
|                                              |           |           |           |   |           |           |          |
|                                              |           |           |           |   |           |           |          |
|                                              |           |           |           |   |           |           |          |
|                                              |           |           |           |   |           |           |          |
|                                              |           |           |           |   |           |           |          |
|                                              |           |           |           |   |           |           |          |
|                                              |           |           |           |   |           |           |          |
|                                              |           |           |           |   |           |           |          |
|                                              |           |           |           |   |           |           |          |
|                                              |           |           |           |   |           |           |          |
|                                              |           |           |           |   |           |           |          |
|                                              |           |           |           |   |           |           |          |
|                                              |           |           |           |   |           |           |          |
|                                              |           |           |           |   |           |           |          |
|                                              |           |           |           |   |           |           |          |
|                                              |           |           |           |   |           |           |          |
|                                              |           |           |           |   |           |           |          |
|                                              |           |           |           |   |           |           |          |
|                                              |           |           |           |   |           |           |          |
|                                              |           |           |           |   |           |           |          |
|                                              |           |           |           |   |           |           |          |
|                                              |           |           |           |   |           |           |          |
|                                              |           |           |           |   |           |           |          |
|                                              |           |           |           |   |           |           |          |
|                                              |           |           |           |   |           |           |          |
|                                              |           |           |           |   |           |           |          |
|                                              |           |           |           |   |           |           |          |
|                                              |           |           |           |   |           |           |          |
|                                              |           |           |           |   |           |           |          |
|                                              |           |           |           |   |           |           |          |
|                                              |           |           |           |   |           |           |          |
|                                              |           |           |           |   |           |           |          |
|                                              |           |           |           |   |           |           |          |
|                                              |           |           |           |   |           |           |          |
|                                              |           |           |           |   |           |           |          |
|                                              |           |           |           |   |           |           |          |
|                                              |           |           |           |   |           |           |          |
|                                              |           |           |           |   |           |           |          |
|                                              |           |           |           |   |           |           |          |
|                                              |           |           |           |   |           |           |          |
|                                              |           |           |           |   |           |           |          |
|                                              |           |           |           |   |           |           |          |
|                                              |           |           |           |   |           |           |          |
|                                              |           |           |           |   |           |           |          |
|                                              |           |           |           |   |           |           |          |
|                                              |           |           |           |   |           |           |          |
|                                              |           |           |           |   |           |           |          |
|                                              |           |           |           |   |           |           |          |
|                                              |           |           |           |   |           |           |          |
|                                              |           |           |           |   |           |           |          |
|                                              |           |           |           |   |           |           |          |
|                                              |           |           |           |   |           |           |          |
|                                              |           |           |           |   |           |           |          |
|                                              |           |           |           |   |           |           |          |
|                                              |           |           |           |   |           |           |          |
|                                              |           |           |           |   |           |           |          |
|                                              |           |           |           |   |           |           |          |
|                                              |           |           |           |   |           |           |          |
|                                              |           |           |           |   |           |           |          |
|                                              |           |           |           |   |           |           |          |
|                                              |           |           |           |   |           |           |          |
|                                              |           |           |           |   |           |           |          |
|                                              |           |           |           |   |           |           |          |
|                                              |           |           |           |   |           |           |          |
|                                              |           |           |           |   |           |           |          |
|                                              |           |           |           |   |           |           |          |
|                                              |           |           |           |   |           |           |          |
|                                              |           |           |           |   |           |           |          |
|                                              |           |           |           |   |           |           |          |
|                                              |           |           |           |   |           |           |          |
|                                              |           |           |           |   |           |           |          |
|                                              |           |           |           |   |           |           |          |
|                                              |           |           |           |   |           |           |          |
|                                              |           |           |           |   |           |           |          |
|                                              |           |           |           |   |           |           |          |
|                                              |           |           |           |   |           |           |          |
|                                              |           |           |           |   |           |           |          |
|                                              |           |           |           |   |           |           |          |
|                                              |           |           |           |   |           |           |          |
|                                              |           |           |           |   |           |           |          |
|                                              |           |           |           |   |           |           |          |
|                                              |           |           |           |   |           |           |          |
|                                              |           |           |           |   |           |           |          |
|                                              |           |           |           |   |           |           |          |
|                                              |           |           |           |   |           |           |          |
|                                              |           |           |           |   |           |           |          |
|                                              |           |           |           |   |           |           |          |
|                                              |           |           |           |   |           |           |          |
|                                              |           |           |           |   |           |           |          |
|                                              |           |           |           |   |           |           |          |

|   |           |           |          |
|---|-----------|-----------|----------|
| H | 9.203395  | 11.592486 | 4.827806 |
| H | 9.029277  | 15.144210 | 2.424601 |
| C | 10.944196 | 12.872955 | 4.926149 |
| C | 10.854071 | 14.873702 | 3.556595 |
| H | 11.480267 | 12.244915 | 5.630790 |
| H | 11.315112 | 15.788826 | 3.199207 |
| C | 11.533979 | 14.056553 | 4.459716 |
| H | 12.523470 | 14.338140 | 4.805600 |
| O | 7.766086  | 12.990930 | 3.203845 |
| H | 7.737715  | 12.801439 | 2.057462 |

**TSconstrained** E= -458.138757278  
Nimag= -3552.74

|   |           |           |           |
|---|-----------|-----------|-----------|
| O | 0.000000  | 0.000000  | 0.000000  |
| O | 0.000000  | 0.000000  | 2.366573  |
| C | 1.247505  | 0.000000  | 2.735785  |
| C | 2.324822  | 0.375829  | 1.885192  |
| O | 0.745869  | -1.138708 | -0.200838 |
| H | 1.557556  | -0.803229 | -0.619804 |
| C | 1.551899  | -0.478666 | 4.042206  |
| H | 0.722209  | -0.798679 | 4.663066  |
| C | 2.852111  | -0.486222 | 4.497222  |
| H | 2.093729  | 0.738976  | 0.890189  |
| C | 3.628355  | 0.331185  | 2.353375  |
| H | 3.068480  | -0.819551 | 5.507292  |
| C | 3.902430  | -0.091677 | 3.653375  |
| H | 4.441631  | 0.627327  | 1.698303  |
| H | 4.926456  | -0.124302 | 4.010267  |
| H | -0.110103 | 0.029625  | 1.202148  |

**TSdistance** E= -458.062551204  
Nimag= -2816.47

|   |           |           |          |
|---|-----------|-----------|----------|
| O | 9.292102  | 13.373332 | 0.376549 |
| O | 8.117879  | 12.694552 | 0.444526 |
| H | 9.971018  | 12.675087 | 0.426571 |
| C | 8.913661  | 13.256353 | 4.083888 |
| C | 9.597286  | 12.572897 | 5.124813 |
| C | 9.550377  | 14.360299 | 3.449813 |
| H | 9.100432  | 11.724825 | 5.583890 |
| H | 9.029288  | 14.852707 | 2.634068 |
| C | 10.838365 | 13.012937 | 5.544400 |
| C | 10.806180 | 14.766031 | 3.863126 |
| H | 11.348104 | 12.503774 | 6.356246 |
| H | 11.291262 | 15.604947 | 3.374318 |
| C | 11.450528 | 14.103720 | 4.913872 |
| H | 12.432304 | 14.433075 | 5.238605 |
| O | 7.708838  | 12.880173 | 3.751347 |

|   |          |           |          |
|---|----------|-----------|----------|
| H | 7.779725 | 12.736213 | 2.108903 |
|---|----------|-----------|----------|

## Phenoxy/phenol

**TS** E= -614.015521288  
Nimag= -1972.86

|   |           |           |           |
|---|-----------|-----------|-----------|
| C | 0.255755  | 0.785203  | 2.167383  |
| C | 0.514079  | -0.565682 | 2.017184  |
| C | 0.066275  | 1.594561  | 1.044655  |
| H | 0.657257  | -1.217776 | 2.873059  |
| H | -0.134143 | 2.654131  | 1.167173  |
| C | 0.625937  | -1.139881 | 0.715945  |
| C | 0.109383  | 1.035887  | -0.243594 |
| H | -0.061108 | 1.668455  | -1.109500 |
| C | 0.392041  | -0.302423 | -0.414594 |
| H | 0.461860  | -0.757102 | -1.397577 |
| H | 0.207056  | 1.217754  | 3.161881  |
| O | 0.973170  | -2.381703 | 0.552120  |
| H | 2.019079  | -2.568428 | 1.112959  |
| C | 3.382683  | -0.313201 | 0.728576  |
| C | 3.550961  | 1.048136  | 0.909655  |
| C | 3.319415  | -1.189436 | 1.852630  |
| H | 3.563525  | 1.709312  | 0.048722  |
| C | 3.696284  | 1.574394  | 2.195435  |
| C | 3.507516  | -0.634911 | 3.153149  |
| H | 3.826039  | 2.643131  | 2.332730  |
| H | 3.475694  | -1.316108 | 3.997451  |
| C | 3.700529  | 0.720748  | 3.311198  |
| H | 3.836519  | 1.136284  | 4.305086  |
| H | 3.275634  | -0.748388 | -0.260048 |
| O | 3.055039  | -2.454157 | 1.710450  |

**TSconstrained** E= -614.008717050  
Nimag= -2961.75

|   |           |           |           |
|---|-----------|-----------|-----------|
| C | -0.526575 | 0.939161  | 1.767128  |
| C | 0.115596  | -0.274904 | 1.613643  |
| C | -0.900674 | 1.693343  | 0.648970  |
| H | 0.404976  | -0.876315 | 2.470092  |
| H | -1.412827 | 2.640911  | 0.779623  |
| C | 0.419094  | -0.760166 | 0.309981  |
| C | -0.616583 | 1.221844  | -0.639708 |
| H | -0.908178 | 1.809423  | -1.504750 |
| C | 0.037544  | 0.019077  | -0.816069 |
| H | 0.279395  | -0.366671 | -1.800642 |
| H | -0.750519 | 1.306050  | 2.764013  |
| O | 1.023048  | -1.897127 | 0.124370  |
| H | 1.580537  | -2.294460 | 1.094229  |

|   |          |           |          |
|---|----------|-----------|----------|
| C | 3.879585 | -4.202352 | 2.660135 |
| C | 4.418020 | -5.467137 | 2.533470 |
| C | 2.765698 | -3.815734 | 1.866100 |
| H | 5.266457 | -5.756282 | 3.145947 |
| C | 3.881340 | -6.378571 | 1.614209 |
| C | 2.223135 | -4.754561 | 0.943397 |
| H | 4.311659 | -7.369981 | 1.518475 |
| H | 1.369142 | -4.455820 | 0.343072 |
| C | 2.787486 | -6.010220 | 0.822521 |
| H | 2.372303 | -6.719637 | 0.113368 |
| H | 4.279651 | -3.472467 | 3.355758 |
| O | 2.263453 | -2.624197 | 2.007533 |

**TSdistance** E= -613.871131778  
Nimag= -617.88

|   |           |           |           |
|---|-----------|-----------|-----------|
| C | -1.821567 | 0.644199  | 1.576901  |
| C | -1.270780 | -0.617142 | 1.547066  |
| C | -1.650280 | 1.513407  | 0.486796  |
| H | -1.380559 | -1.315979 | 2.369899  |
| H | -2.087204 | 2.506472  | 0.518746  |
| C | -0.522004 | -1.065341 | 0.401111  |
| C | -0.919181 | 1.112882  | -0.643740 |
| H | -0.798359 | 1.800330  | -1.475105 |
| C | -0.359943 | -0.144033 | -0.694243 |
| H | 0.212072  | -0.488770 | -1.549493 |
| H | -2.389800 | 0.973788  | 2.441098  |
| O | -0.039312 | -2.232913 | 0.350663  |
| H | 1.996326  | -2.354655 | 1.158065  |
| C | 5.171661  | -0.408564 | 1.193868  |
| C | 5.655315  | 0.854407  | 1.451430  |
| C | 4.447359  | -1.138135 | 2.202677  |
| H | 6.205628  | 1.396551  | 0.688784  |
| C | 5.438285  | 1.449525  | 2.705142  |
| C | 4.236886  | -0.493150 | 3.473232  |
| H | 5.822357  | 2.445921  | 2.899547  |
| H | 3.683701  | -1.048251 | 4.223819  |
| C | 4.728999  | 0.770627  | 3.709745  |
| H | 4.571993  | 1.248865  | 4.671515  |
| H | 5.318228  | -0.900384 | 0.237764  |
| O | 4.026656  | -2.310856 | 1.986839  |

#### Benzyl/toluene

**Toluene** E= -271.433220704

|   |          |           |          |
|---|----------|-----------|----------|
| C | 0.239360 | 0.778340  | 2.158199 |
| C | 0.535647 | -0.571985 | 1.999172 |
| C | 0.042034 | 1.586755  | 1.041315 |

|   |           |           |           |
|---|-----------|-----------|-----------|
| H | 0.685140  | -1.199381 | 2.874761  |
| H | -0.192097 | 2.639717  | 1.163127  |
| C | 0.642690  | -1.138991 | 0.726737  |
| C | 0.142914  | 1.033331  | -0.231961 |
| H | -0.013955 | 1.653580  | -1.109478 |
| C | 0.439538  | -0.318458 | -0.384747 |
| H | 0.513273  | -0.745917 | -1.381895 |
| H | 0.158353  | 1.199418  | 3.155938  |
| H | 2.082549  | -2.736929 | 0.552706  |
| C | 0.995591  | -2.595816 | 0.559570  |
| H | 0.605854  | -2.993395 | -0.381372 |
| H | 0.591307  | -3.198302 | 1.377794  |

**Benzyl** E= -270.779437967

|   |           |           |           |
|---|-----------|-----------|-----------|
| C | 0.250516  | 0.768019  | 2.157730  |
| C | 0.468714  | -0.589296 | 1.999848  |
| C | 0.086177  | 1.592721  | 1.041345  |
| H | 0.596022  | -1.227452 | 2.870264  |
| H | -0.084791 | 2.656670  | 1.169031  |
| C | 0.530978  | -1.174381 | 0.709181  |
| C | 0.143126  | 1.038674  | -0.240575 |
| H | 0.015786  | 1.675056  | -1.111162 |
| C | 0.360893  | -0.317515 | -0.408410 |
| H | 0.404354  | -0.744865 | -1.406697 |
| H | 0.206984  | 1.193592  | 3.155793  |
| C | 0.752730  | -2.558111 | 0.543287  |
| H | 0.799380  | -3.001936 | -0.443711 |
| H | 0.881190  | -3.209394 | 1.399274  |

**TS** E= -542.191988051  
Nimag= -1518.32

|   |           |           |           |
|---|-----------|-----------|-----------|
| C | 0.203890  | 1.070675  | 1.857984  |
| C | 0.349203  | -0.297707 | 2.038190  |
| C | 0.092555  | 1.601723  | 0.572874  |
| H | 0.456080  | -0.705105 | 3.040304  |
| H | -0.018601 | 2.672443  | 0.431959  |
| C | 0.389520  | -1.170764 | 0.937922  |
| C | 0.122335  | 0.748924  | -0.529399 |
| H | 0.029780  | 1.154201  | -1.532816 |
| C | 0.271115  | -0.620846 | -0.349444 |
| H | 0.301992  | -1.282828 | -1.211785 |
| H | 0.188401  | 1.728357  | 2.721918  |
| H | 2.025274  | -2.663835 | 1.107550  |
| C | 3.534112  | -0.035805 | 0.779611  |
| C | 3.590354  | 1.257073  | 1.280988  |
| C | 3.557554  | -1.145888 | 1.640734  |
| H | 3.558330  | 2.100742  | 0.598079  |

|   |          |           |           |
|---|----------|-----------|-----------|
| C | 3.673670 | 1.473784  | 2.656539  |
| C | 3.646179 | -0.910973 | 3.023024  |
| H | 3.715300 | 2.485289  | 3.048673  |
| H | 3.663400 | -1.759449 | 3.703180  |
| C | 3.705463 | 0.383492  | 3.524534  |
| H | 3.776452 | 0.543996  | 4.596395  |
| H | 3.449087 | -0.199761 | -0.291601 |
| C | 0.668668 | -2.594889 | 1.121888  |
| H | 0.380791 | -3.252685 | 0.301587  |
| H | 0.433022 | -3.005976 | 2.103931  |
| C | 3.374040 | -2.500986 | 1.121416  |
| H | 3.712253 | -3.313723 | 1.764505  |
| H | 3.629659 | -2.650152 | 0.071981  |

**TSconstrained** E= -542.186897300  
Nimag= -1508.71

|   |           |           |           |
|---|-----------|-----------|-----------|
| C | -0.174468 | 1.079813  | 1.553748  |
| C | 0.169487  | -0.244308 | 1.795162  |
| C | -0.253698 | 1.557484  | 0.246469  |
| H | 0.228353  | -0.612815 | 2.816398  |
| H | -0.523947 | 2.591582  | 0.057598  |
| C | 0.438556  | -1.125593 | 0.735514  |
| C | 0.014470  | 0.696435  | -0.816649 |
| H | -0.047530 | 1.059247  | -1.838314 |
| C | 0.358419  | -0.627645 | -0.575018 |
| H | 0.564994  | -1.295885 | -1.407491 |
| H | -0.384274 | 1.742711  | 2.387925  |
| H | 2.205302  | -2.500929 | 1.099994  |
| C | 4.050926  | -4.364800 | 2.787208  |
| C | 4.395329  | -5.687392 | 3.036269  |
| C | 3.972083  | -3.873903 | 1.473946  |
| H | 4.456351  | -6.044725 | 4.059923  |
| C | 4.665258  | -6.553939 | 1.978082  |
| C | 4.242875  | -4.760689 | 0.419325  |
| H | 4.935878  | -7.586857 | 2.172794  |
| H | 4.184946  | -4.397641 | -0.603928 |
| C | 4.587295  | -6.083300 | 0.668171  |
| H | 4.798464  | -6.750507 | -0.162216 |
| H | 3.843075  | -3.692266 | 3.615885  |
| C | 0.861244  | -2.504898 | 0.992254  |
| H | 0.721034  | -3.210393 | 0.172462  |
| H | 0.577551  | -2.921637 | 1.959375  |
| C | 3.549216  | -2.496204 | 1.209052  |
| H | 3.834228  | -2.084596 | 0.240130  |
| H | 3.687919  | -1.786216 | 2.025232  |

**Methoxyl/methanol**

**Methanol** E= -115.6547578

|   |           |           |           |
|---|-----------|-----------|-----------|
| C | -0.046785 | 0.658091  | 0.000000  |
| H | -1.091646 | 0.973590  | 0.000000  |
| H | 0.437523  | 1.077763  | 0.891937  |
| H | 0.437523  | 1.077763  | -0.891937 |
| O | -0.046785 | -0.753213 | 0.000000  |
| H | 0.871595  | -1.051960 | 0.000000  |

**Methoxyl** E= -114.9889688

|   |           |           |           |
|---|-----------|-----------|-----------|
| C | -0.009738 | -0.577810 | 0.000000  |
| H | 1.056999  | -0.867510 | 0.000000  |
| H | -0.460335 | -1.006509 | 0.905992  |
| H | -0.460335 | -1.006509 | -0.905992 |
| O | -0.009738 | 0.793424  | 0.000000  |

**TS** E= -230.635760987  
Nimag= -1809.67

|   |          |           |           |
|---|----------|-----------|-----------|
| O | 1.332618 | -0.130554 | 0.490813  |
| H | 2.006671 | -0.077235 | 1.433628  |
| O | 2.820453 | -0.518371 | 2.133057  |
| C | 2.132974 | -0.394625 | -0.621739 |
| H | 2.947898 | 0.328781  | -0.738231 |
| H | 2.543247 | -1.414321 | -0.599874 |
| H | 1.470766 | -0.324514 | -1.494450 |
| C | 2.464528 | -1.824683 | 2.472053  |
| H | 1.463109 | -1.889868 | 2.912409  |
| H | 2.536189 | -2.506190 | 1.612401  |
| H | 3.200238 | -2.155100 | 3.216786  |

**TSconstrained** E= -230.632333659  
Nimag= -1919.88

|   |          |           |           |
|---|----------|-----------|-----------|
| O | 0.960432 | -0.045941 | 0.251547  |
| H | 1.945154 | -0.341033 | 0.788183  |
| O | 2.655988 | -0.405712 | 1.702259  |
| C | 1.197810 | 1.228113  | -0.271960 |
| H | 1.237602 | 1.990276  | 0.517303  |
| H | 2.111196 | 1.274492  | -0.877214 |
| H | 0.336824 | 1.459693  | -0.912867 |
| C | 2.360812 | -1.630059 | 2.308469  |
| H | 1.383071 | -1.610488 | 2.807539  |
| H | 2.400772 | -2.471557 | 1.606299  |
| H | 3.124879 | -1.778940 | 3.082874  |
